# Supplementary material for: The Effect of Low-Processing Temperature on the Physicochemical and Mechanical Properties of Bovine Hydroxyapatite Bone Substitutes
Source: MDPI journal article supplement (doi:10.3390/ma15082798), 2022-04-11
Supplement: s1 [file s1]

Supplementary Materials

# The Effect of Low-Processing Temperature on the Physicochemical and Mechanical Properties of Bovine Hydroxyapatite Bone Substitutes

Dina Abdelmoneim <sup>1,\*</sup>, Gemma Claire Porter <sup>1</sup>, Dawn Elizabeth Coates <sup>1</sup>, Warwick John Duncan <sup>1</sup>, John Neil Waddell <sup>1</sup>, Niels Hammer <sup>2,3,4</sup> and Kai Chun Li <sup>1</sup>

<sup>1</sup> Sir John Walsh Research Institute, Faculty of Dentistry, University of Otago, Dunedin 9016, New Zealand; gemmacotton22@gmail.com (G.C.P.); dawn.coates@otago.ac.nz (D.E.C.); warwick.duncan@otago.ac.nz (W.J.D.); j.neil.waddell@icloud.com (J.N.W.); kc.li@otago.ac.nz (K.C.L.)

<sup>2</sup> Division of Macroscopic and Clinical Anatomy, Gottfried Schatz Research Center, Medical University of Graz 8010, Austria; niels.hammer@medunigraz.at

<sup>3</sup> Department of Orthopedic and Trauma Surgery, University of Leipzig 04103, Germany

<sup>4</sup> Fraunhofer Fraunhofer Institute for Machine Tools and Forming Technology (IWU), Medical Branch, Dresden 01187, Germany

\* Correspondence: dina.abdelmoneim@otago.ac.nz

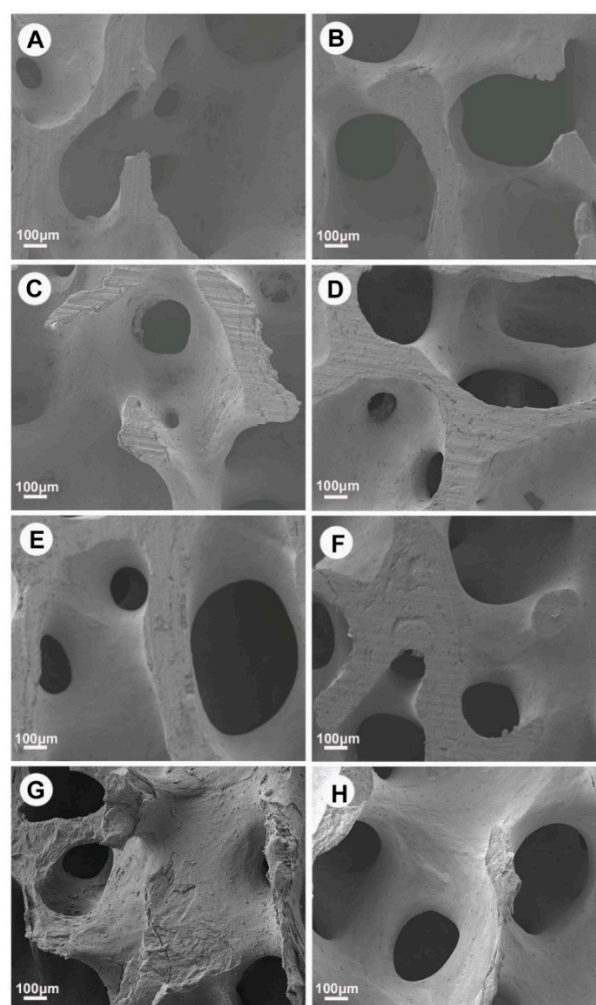

**Figure S1.** Representative low magnification scanning electron microscope images of the surface of heat-treated MoaBone and controls. (A) Half-processed MB, (B) MB 100 °C, (C) MB 130 °C, (D) MB 160 °C, (E) MB 190 °C, (F) MB 220 °C, (G) MoaBone®, (H) Bio-Oss®. Scale bar = 100 µm.

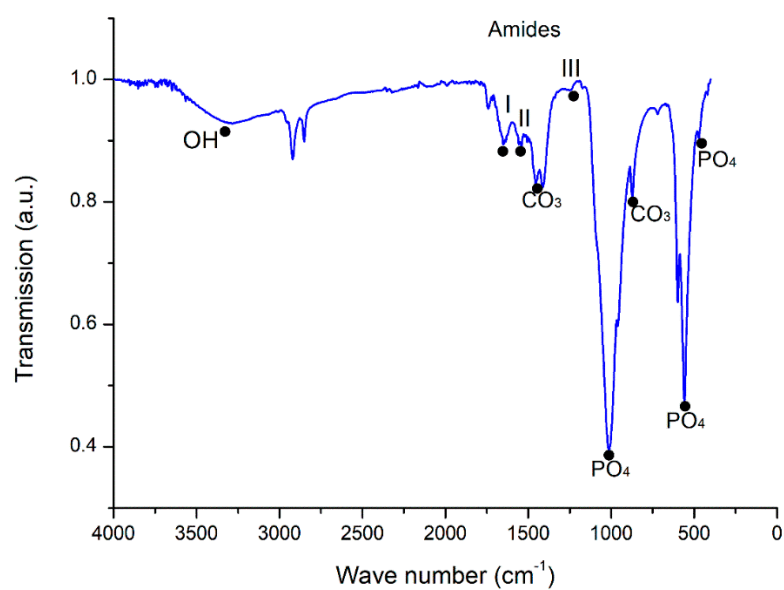

**Figure S2.** Representative FTIR spectra of the half-processed MoaBone with the relevant characteristic bands labelled.
